# Supplementary material for: Magnetically recoverable Fe3O4@SiO2@SBA-3@2-ATP-Cu: an improved catalyst for the synthesis of 5-substituted 1H-tetrazoles
Source: Royal Society of Chemistry journal article supplement (doi:10.1039/d4na00414k), 2024-01-01
Supplement: d4na00414k1.pdf [file d4na00414k1.pdf]

## Magnetically Recoverable Fe<sub>3</sub>O<sub>4</sub>@SiO<sub>2</sub>@SBA-3@2-ATP-Cu: An Improved Catalyst for the Synthesis of 5-Substituted 1H-Tetrazoles

Zahra Heidarneshad,<sup>a</sup> Arash Ghorbani-Choghamarani,<sup>b,\*</sup> Zahra Taherinia<sup>a</sup>

<sup>a</sup> Department of Chemistry, Faculty of Science, Ilam University, Ilam, Iran. <sup>b</sup> Department of Organic Chemistry, Faculty of Chemistry, Bu-Ali Sina University, Hamedan 6517838683, Tel: +988138282807, Fax: +988138380709, Iran; E-mail: [a.ghorbani@basu.ac.ir](mailto:a.ghorbani@basu.ac.ir) or arashghch58@yahoo.com.

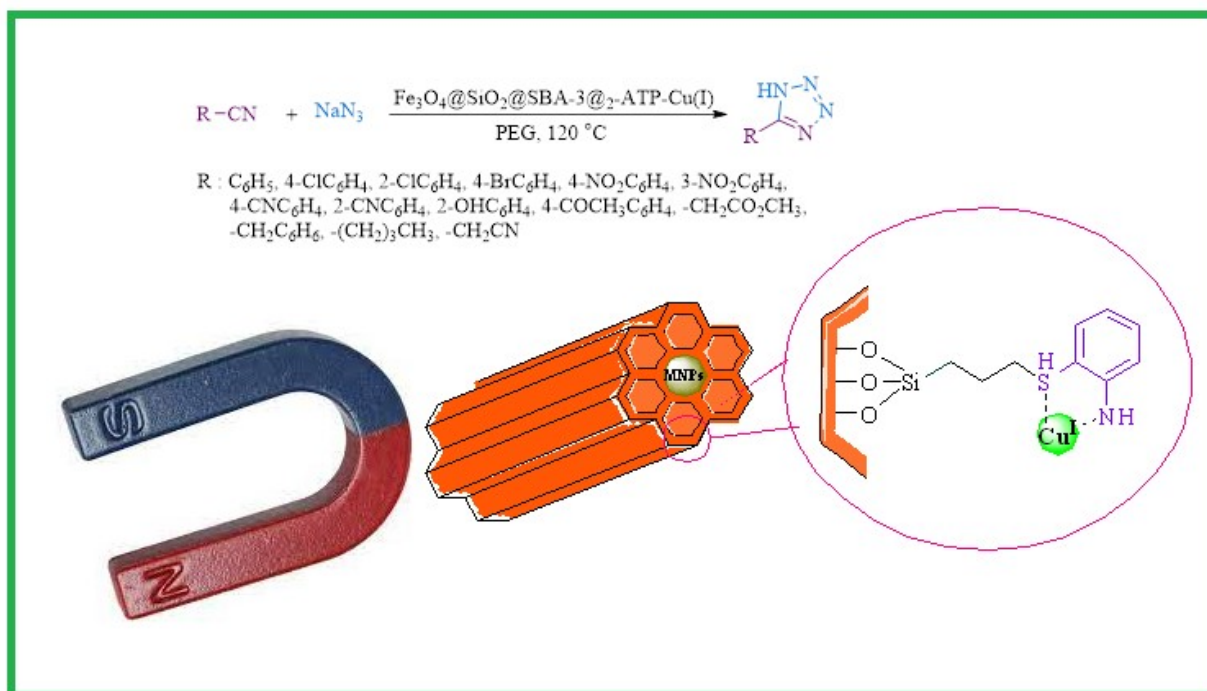

**5-(4-nitrophenyl)-1H-tetrazole** (Table 4, entry 4): <sup>1</sup>H NMR (250 MHz, DMSO) δ 8.43(d, *J* = 8.4 Hz, 2H), 8.228(d, *J* = 8.2 Hz, 2H).

**1-(4-(1H-tetrazol-5-yl)phenyl)ethan-1-one**(Table 4, entry 5): <sup>1</sup>H NMR (250 MHz, DMSO) δ 8.4315(s, 4H), 2.62(s, 3H).

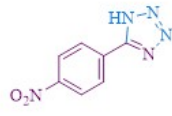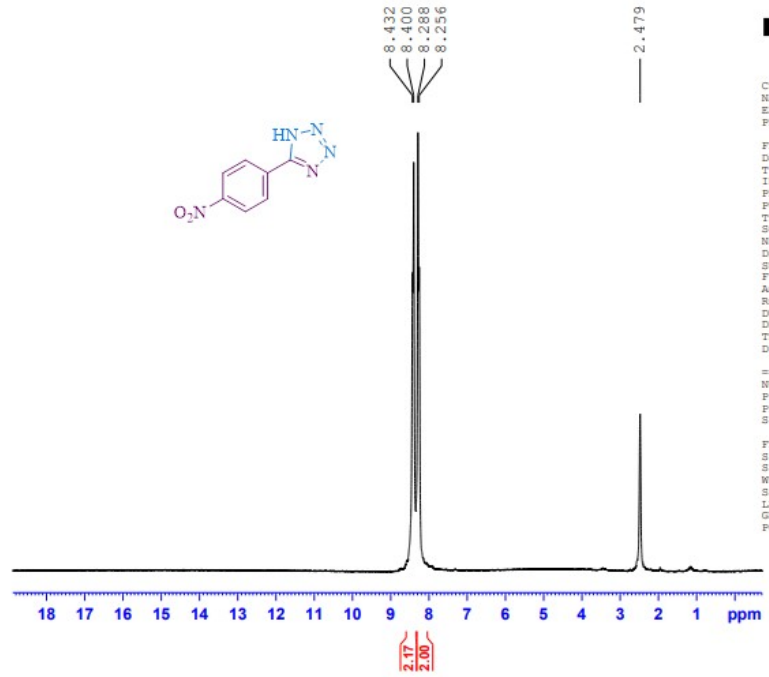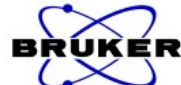

Current Data Parameters  
 NAME ilam  
 EXPNO 655  
 PROCNO 1

F2 - Acquisition Parameters  
 Date\_ 20211129  
 Time 11.31  
 INSTRUM spect  
 PROBRD 5 mm Multinucl  
 FULPROG zg  
 TD 16384  
 SOLVENT DMSO  
 NS 10  
 DS 0  
 SWH 6265.664 Hz  
 FIDRES 0.382426 Hz  
 AQ 1.3074932 sec  
 RG 32  
 DW 79.800 usec  
 DE 6.00 usec  
 TE 300.0 K  
 D1 3.00000000 sec

===== CHANNEL f1 =====  
 NUC1 1H  
 P1 9.00 usec  
 PL1 3.00 dB  
 SF01 250.1325013 MHz

F2 - Processing parameters  
 SI 32768  
 SF 250.1300000 MHz  
 WDW EM  
 SSB 0  
 LB 0.50 Hz  
 GB 0  
 PC 1.00

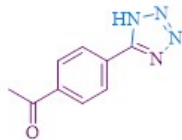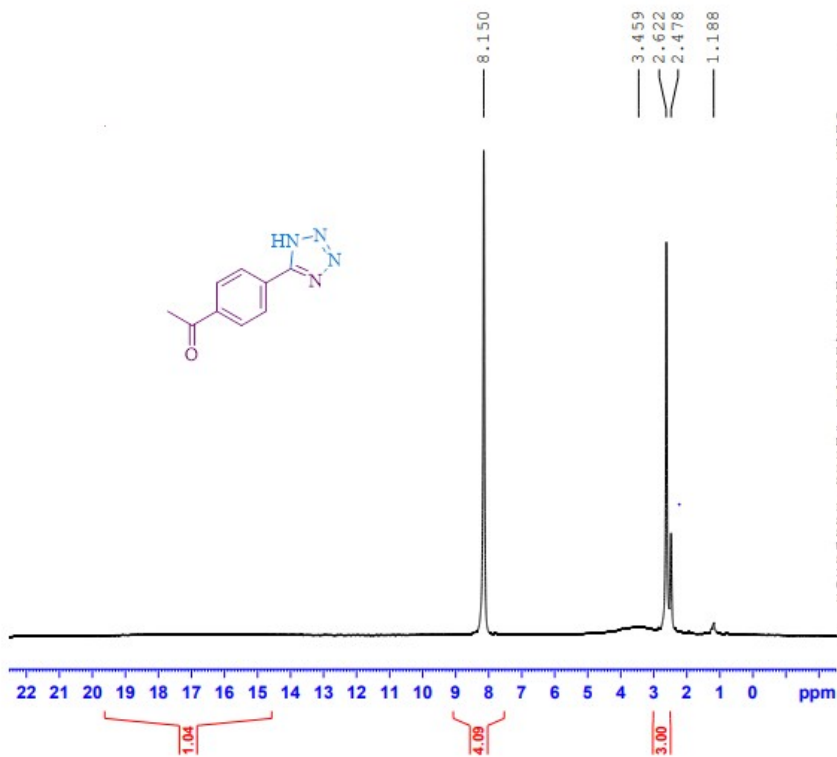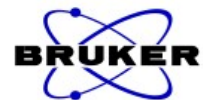

Current Data Parameters  
NAME ilam  
EXPNO 652  
PROCNO 1

F2 - Acquisition Parameters  
Date\_ 20211129  
Time\_ 11.19  
INSTRUM spect  
PROBHD 5 mm Multinucl  
PULPROG zg  
TD 16384  
SOLVENT DMSO  
NS 10  
DS 0  
SWH 6265.664 Hz  
FIDRES 0.382426 Hz  
AQ 1.3074932 sec  
RG 32  
CW 79.800 usec  
DE 6.00 usec  
TE 300.0 K  
D1 3.0000000 sec

===== CHANNEL f1 =====  
NUC1 1H  
P1 9.00 usec  
PL1 3.00 dB  
SFO1 250.1325013 MHz

F2 - Processing parameters  
SI 32768  
SF 250.1300000 MHz  
WDW EM  
SSB 0  
LB 2.00 Hz  
GB 0  
PC 1.00
